# Supplementary material for: Comparative analysis of complete Ilex (Aquifoliaceae) chloroplast genomes: insights into evolutionary dynamics and phylogenetic relationships
Source: PubMed Central journal article supplement (PMC8922745; doi:10.1186/s12864-022-08397-9), 2022-03-14

# Figure S1

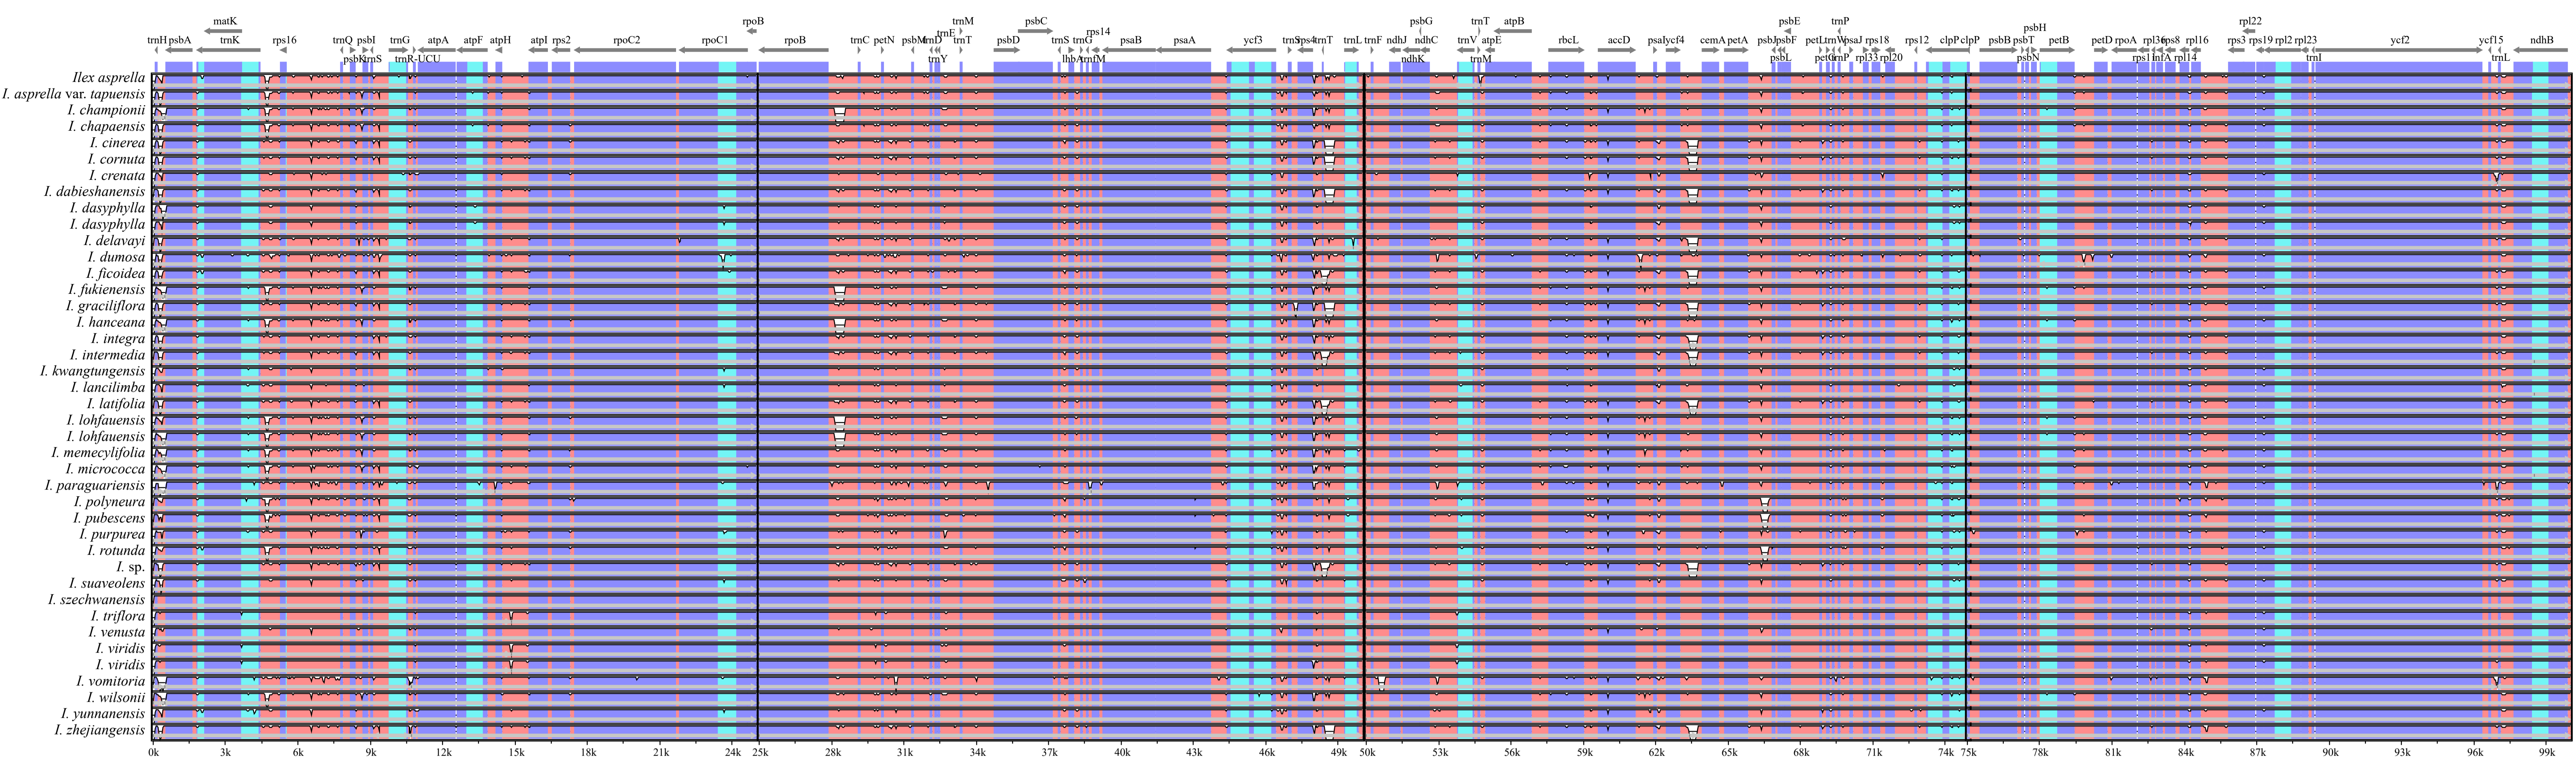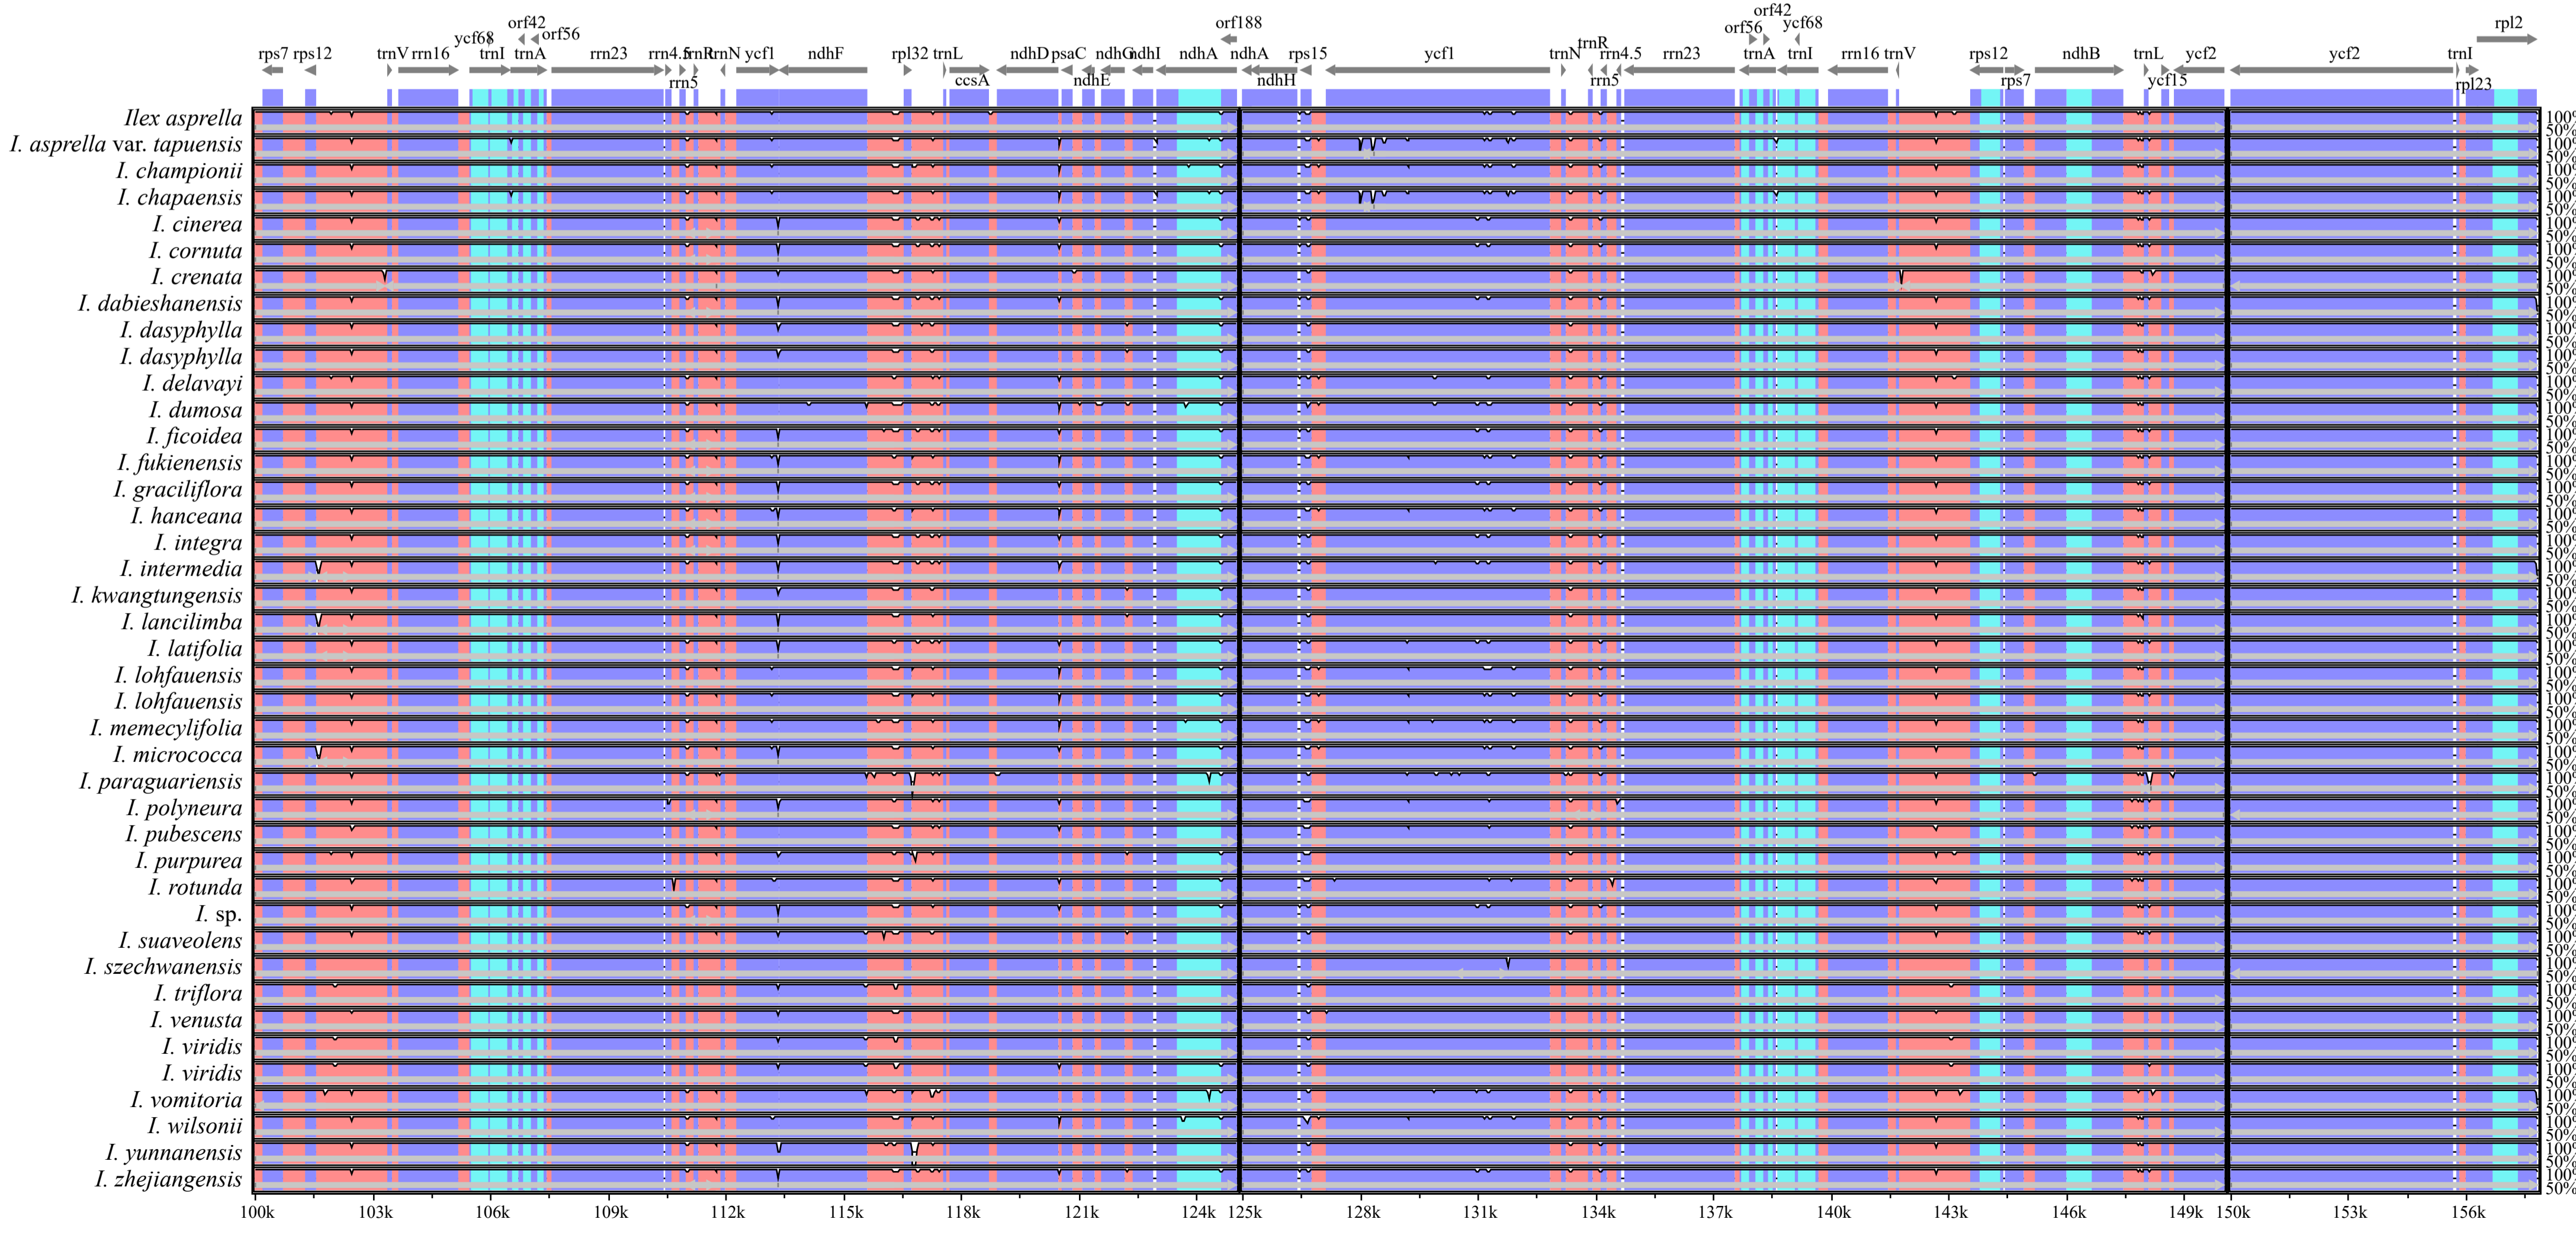

**Figure S2**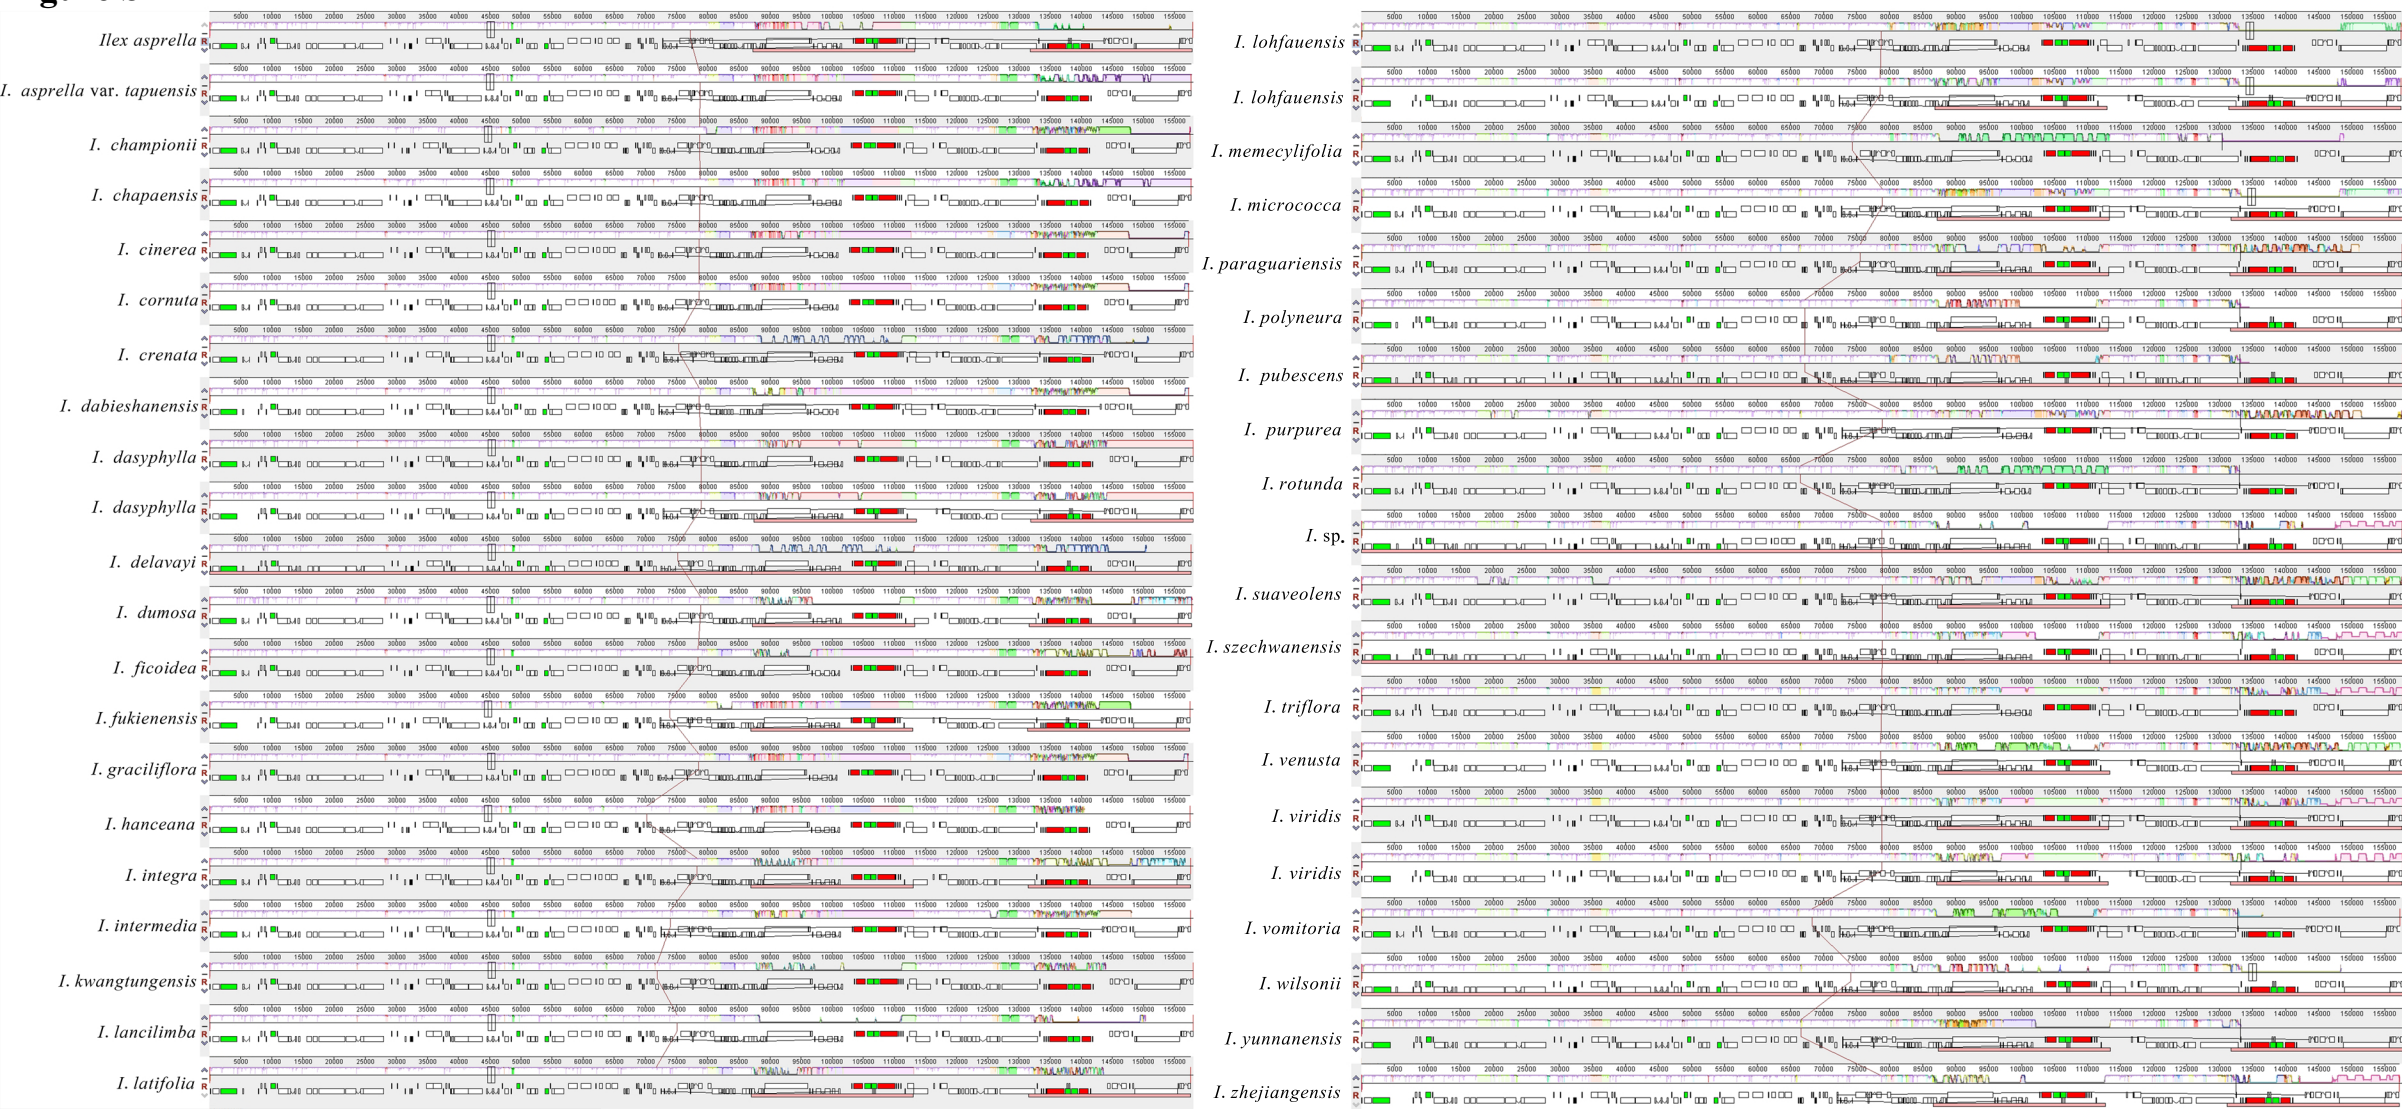

**Figure S3**

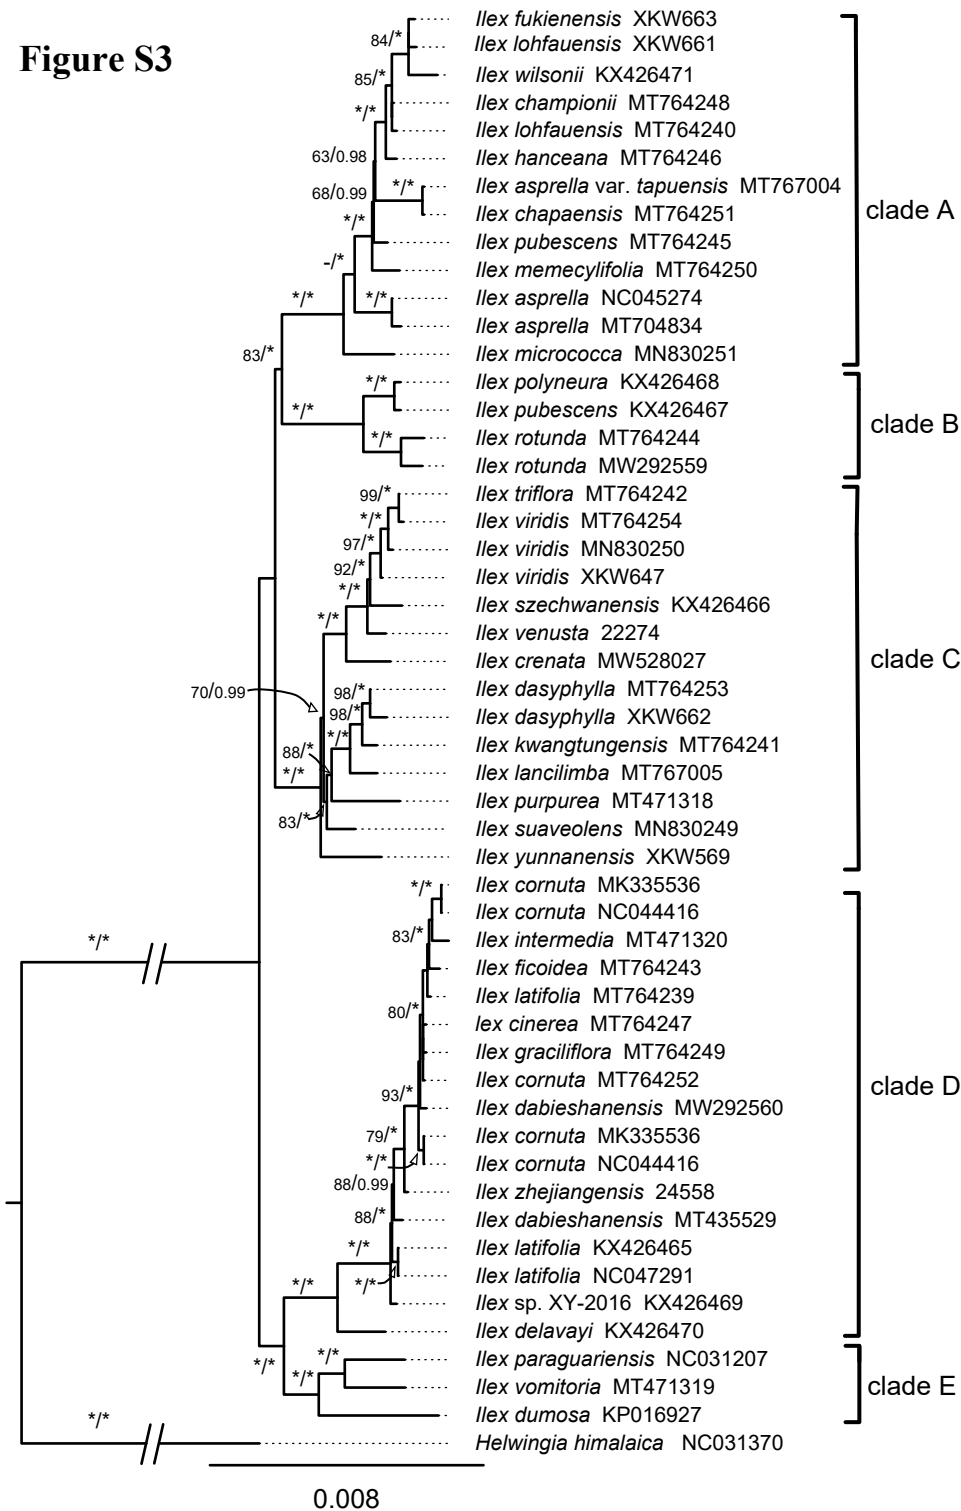

Supplement: 12864_2022_8397_MOESM2_ESM.pdf [file 12864_2022_8397_MOESM2_ESM.pdf]
